# Supplementary material for: Vision is highly sensitive to oxygen availability in marine invertebrate larvae
Source: Oxford University Press journal article supplement (doi:10.1242/jeb.200899), 2019-01-01
Supplement: jeb200899supp.pdf [file jeb200899supp.pdf]

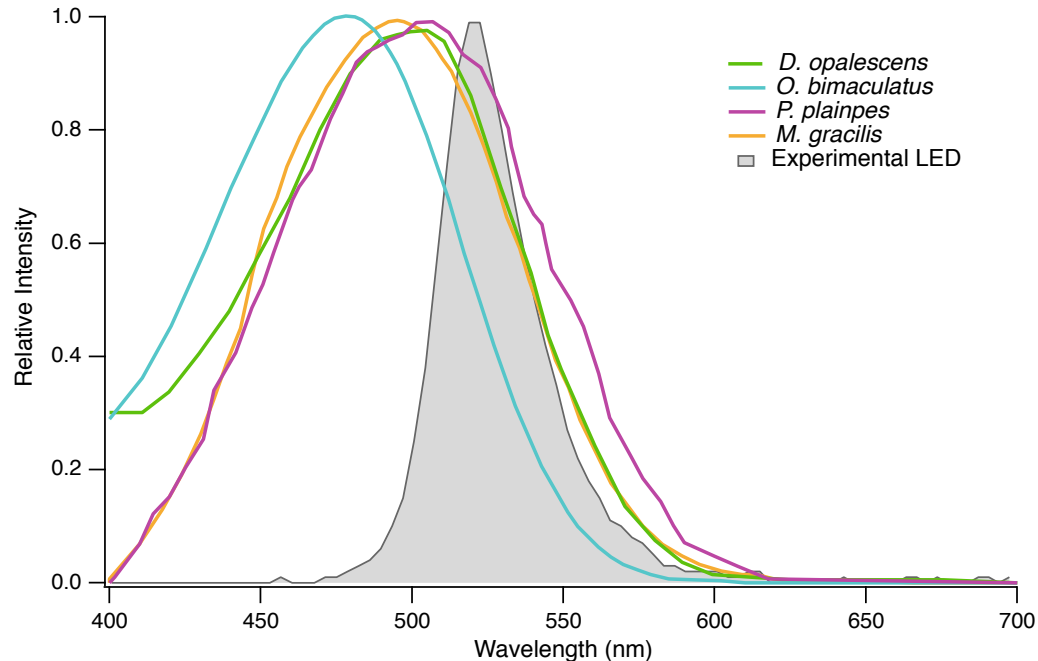

**Fig S1. Comparison of experimental light and spectral sensitivities of each species.**

Estimated spectral sensitivities of the market squid, *Doryteuthis opalescens* (green line); the octopus, *Octopus bimaculatus* (teal line); the tuna crab, *Pleuroncodes planipes* (magenta line); and the graceful rock crab, *M. gracilis* (orange line), in comparison to the spectrum of the green LED (gray line and shading) used in all experiments (525 nm, 35 nm FWHM; Thorlabs). Data for spectral sensitivities were obtained or modified from existing literature for the same species, or a taxonomically related species with similar life history and habitat depth: *D. opalescens* from sensitivity of *Doryteuthis pealeii* (Hubbard et al., 1959); *O. bimaculatus* from sensitivity of *O. vulgaris* (Brown and Brown, 1958); *P. planipes* (Fernandez, 1973); and *M. gracilis* from *Cancer irroratus* (Cronin and Forward, 1988). These spectra were used to determine the species-specific photon flux density.

**Table S1. Statistical results of response-irradiance relationships.**

Statistical comparisons of light series tests (Figs. 4, 5) conducted on the larvae of the market squid, *D. opalescens* (green); the octopus, *O. bimaculatus* (teal); the tuna crab, *P. planipes* (magenta); and the graceful rock crab, *M. gracilis* (orange). Differences between visual responses at three oxygen conditions (normoxia,  $\sim 22$  kPa/ $\sim 265$   $\mu\text{mol kg}^{-1}$ ; intermediate reduction of  $\text{pO}_2$ ,  $\sim 6.5$  kPa/ $\sim 95$   $\mu\text{mol kg}^{-1}$ ; and low  $\text{pO}_2$ ,  $\sim 3.5$  kPa/ $\sim 55$   $\mu\text{mol kg}^{-1}$ ) at each experimental irradiance [in species-specific photon flux density ( $\mu\text{mol photons m}^{-2} \text{s}^{-1}$ )] were determined using Kruskal-Wallis tests in each species. Results are presented for the light series visual responses normalized to both the maximum value of normoxia (“Normalized to normoxia”; Fig. 4) and the maximum value within each oxygen condition (“Normalized within each condition”; Fig 5). Significant values ( $p < 0.05$ ) are presented in bold. Abbreviations: df = degrees of freedom; NA = not applicable; PFD = photon flux density.

|                       |                                  |               |              |              |              |              |              |              |              |              |              |
|-----------------------|----------------------------------|---------------|--------------|--------------|--------------|--------------|--------------|--------------|--------------|--------------|--------------|
| df = 2                |                                  | Squid PFD     | 0.033        | 0.296        | 0.557        | 0.815        | 1.073        | 1.327        | 1.581        | 1.834        | 2.087        |
| <i>D. opalescens</i>  | Normalized to normoxia           | Chi squared   | 2.808        | 8.000        | 8.769        | 8.000        | 8.000        | 8.346        | 8.346        | 8.346        | 8.649        |
|                       |                                  | p-value       | 0.246        | <b>0.018</b> | <b>0.012</b> | <b>0.018</b> | <b>0.018</b> | <b>0.015</b> | <b>0.015</b> | <b>0.015</b> | <b>0.013</b> |
|                       | Normalized within each condition | Chi squared   | 1.423        | 4.154        | 3.846        | 1.654        | 4.962        | 2.808        | 0.269        | 3.039        | NA           |
|                       |                                  | p-value       | 0.491        | 0.125        | 0.146        | 0.437        | 0.084        | 0.246        | 0.874        | 0.219        | NA           |
| df = 2                |                                  | Octopus PFD   | 0.024        | 0.209        | 0.393        | 0.576        | 0.758        | 0.938        | 1.117        | 1.296        | 1.474        |
| <i>O. bimaculatus</i> | Normalized to normoxia           | Chi squared   | 2.400        | 6.489        | 7.200        | 6.489        | 6.489        | 6.489        | 6.489        | 6.489        | 6.713        |
|                       |                                  | p-value       | 0.301        | <b>0.039</b> | <b>0.027</b> | <b>0.039</b> | <b>0.039</b> | <b>0.039</b> | <b>0.039</b> | <b>0.039</b> | <b>0.035</b> |
|                       | Normalized within each condition | Chi squared   | 5.067        | 2.222        | 5.067        | 5.600        | 4.267        | 2.756        | 5.689        | 1.689        | NA           |
|                       |                                  | p-value       | 0.079        | 0.329        | 0.079        | 0.061        | 0.118        | 0.252        | 0.058        | 0.430        | NA           |
| df = 2                |                                  | Tuna Crab PFD | 0.036        | 0.323        | 0.608        | 0.891        | 1.173        | 1.450        | 1.727        | 2.004        | 2.280        |
| <i>P. planipes</i>    | Normalized to normoxia           | Chi squared   | 4.500        | 6.731        | 5.654        | 6.269        | 6.000        | 6.731        | 6.000        | 7.731        | 8.290        |
|                       |                                  | p-value       | 0.105        | <b>0.035</b> | 0.059        | <b>0.044</b> | <b>0.050</b> | <b>0.035</b> | <b>0.050</b> | <b>0.021</b> | <b>0.016</b> |
|                       | Normalized within each condition | Chi squared   | 1.500        | 0.269        | 1.192        | 3.136        | 0.615        | 0.115        | 0.154        | 1.631        | NA           |
|                       |                                  | p-value       | 0.472        | 0.874        | 0.551        | 0.209        | 0.735        | 0.944        | 0.926        | 0.443        | NA           |
| df = 2                |                                  | Crab PFD      | 0.032        | 0.288        | 0.542        | 0.794        | 1.045        | 1.292        | 1.539        | 1.786        | 2.031        |
| <i>M. gracilis</i>    | Normalized to normoxia           | Chi squared   | 12.737       | 15.431       | 14.794       | 14.500       | 14.500       | 14.222       | 14.222       | 14.500       | 14.005       |
|                       |                                  | p-value       | <b>0.002</b> | <b>0.000</b> | <b>0.001</b> |
|                       | Normalized within each condition | Chi squared   | 4.774        | 1.433        | 2.151        | 0.693        | 2.821        | 0.693        | 3.468        | 2.331        | NA           |
|                       |                                  | p-value       | 0.092        | 0.488        | 0.341        | 0.707        | 0.244        | 0.707        | 0.177        | 0.312        | NA           |
